# Supplementary material
Source: PubMed Central journal article supplement (PMC4142429)
Supplement: NIHMS614627-supplement-Figure_and_tables.pdf [file NIHMS614627-supplement-Figure_and_tables.pdf]

## Supplement

eFigure. Patient Flow Diagram

eTable 1. Conditions Excluded from Analysis

eTable 2. Procedures Classified as Major or Minor

eTable 3. Distribution of Surgical Procedures between Patient Subgroups

eTable 4. Model 2: Multivariable Logistic Regression Analysis of the Secondary Outcome Neurodevelopmental Impairment among Survivors at 18-22 Months' Corrected Age with Two-Level Surgery Predictor Variable

eTable 5. Model 4: Multivariable Logistic Regression Analysis of the Secondary Outcome Neurodevelopmental Impairment among Survivors at 18-22 Months' Corrected Age with Three-Level Surgery Predictor Variable

eTable 6. Demonstration of Propensity Score Achievement of Balanced Distribution of Covariates.

### Patient Flow Diagram

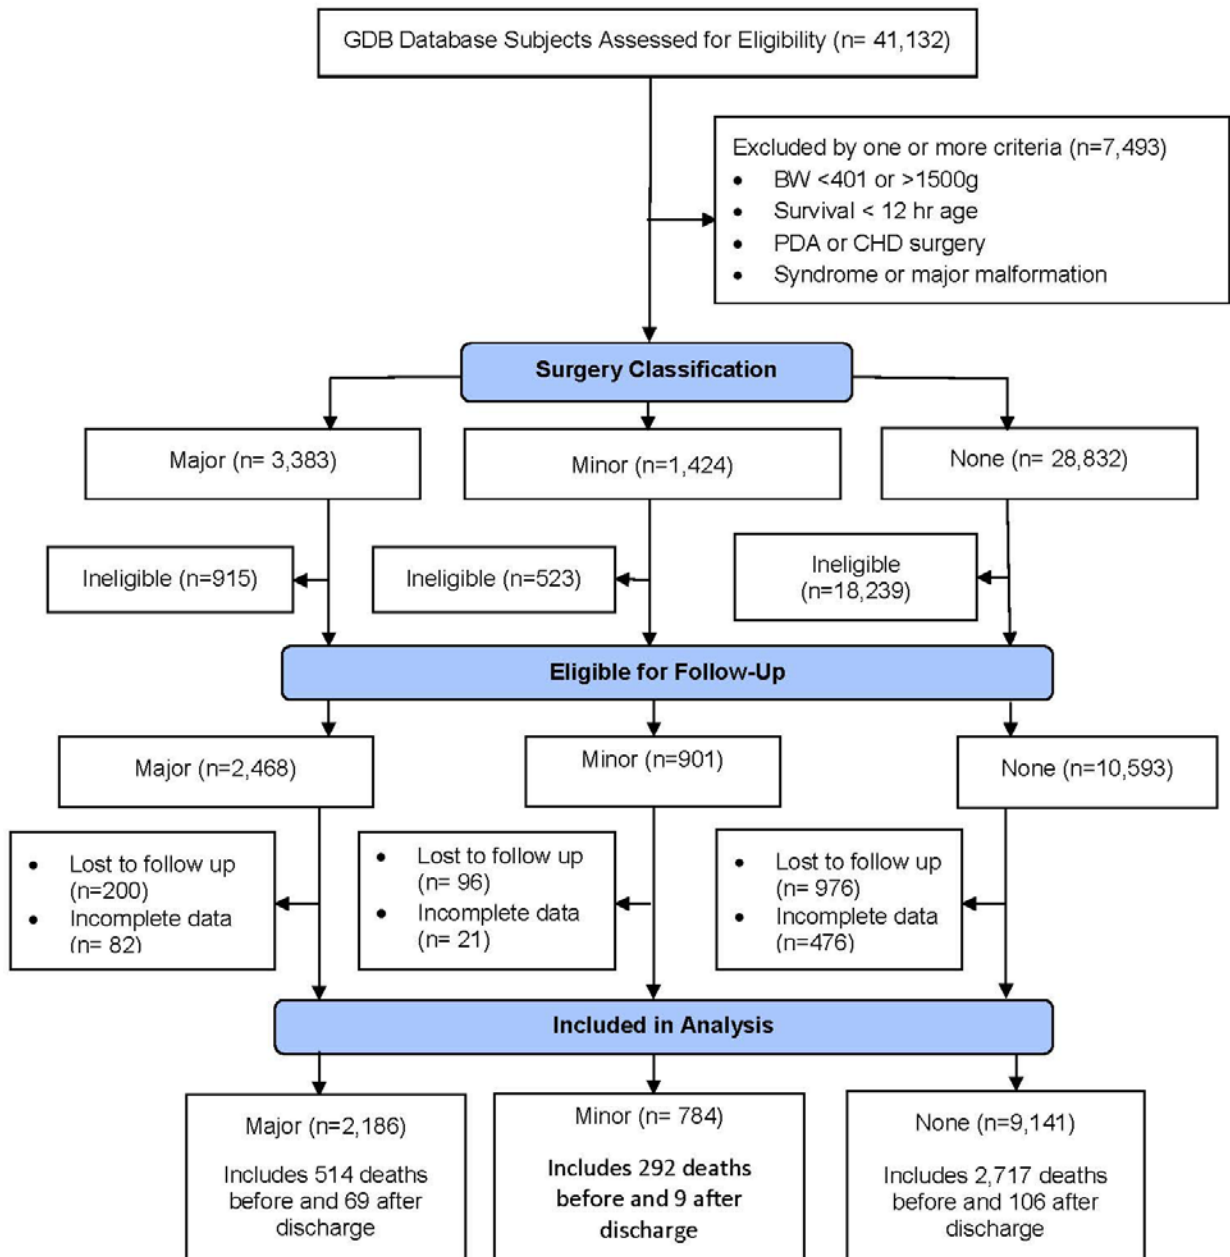

eFigure. Patient Flow Diagram. Eligibility for follow-up evaluation changed during the period studied. Before 2008, patients with birth weights  $\leq 1$ Kg

were eligible; subsequently, patients who were inborn and whose gestational age was <27 weeks gestation were eligible. Consequently, some patients were not eligible for followup. Among the Major surgery patients, 569 were born before 2008, but had birth weights >1 kg, 49 were born after 2007, but were outborn, 243 were born after 2007, but were  $\geq 27$  weeks gestational age, and 54 were born after 2007, but were outborn and  $\geq 27$  weeks gestational age. Among the Minor surgery patients, 360 were born before 2008, but had birth weights > 1 kg, 23 were born after 2007, but were outborn, 130 were born after 2007, but were  $\geq 27$  weeks gestational age, 9 were born after 2007, but were outborn and had gestational ages  $\geq 27$  weeks, and 1 was missing gestational age at followup. Among the None surgery patients, 13 780 were born before 2008, but had birth weights > 1 kg, 160 were born after 2007, but were outborn, 3999 were born after 2007, but had gestational ages  $\geq 27$  weeks, 298 were born after 2007, but were outborn and had gestational ages  $\geq 27$  weeks, 1 had missing gestational age at followup, and 1 had missing final status information.

## **eTable 1. Conditions Excluded from Analysis**

### Chromosomal anomalies

Trisomy 13

Trisomy 18

Trisomy 21

Turner syndrome

Other chromosomal anomalies (includes triploidy, DiGeorge, Klinefelter & Wolf-Hirschhorn syndrome)

### Named syndromes, sequences, and associations

#### Nervous system

Anencephaly

Meningomyelocele ± hydrocephalus

Congenital hydrocephalus

Hydranencephaly

Holoprosencephaly

Myotonic dystrophy/myopathy

Other nervous system anomalies

#### Cardiovascular

All anomalies

#### Genitourinary

Bilateral renal agenesis (Potter's syndrome)

Bilateral polycystic, multicystic, or dysplastic kidneys

Obstructive uropathy with congenital hydronephrosis

Exstrophy of the urinary bladder

Other genitourinary anomalies

#### Bone and skeletal anomalies

#### Miscellaneous single system anomalies

Inborn errors of metabolism

Other multiple system anomalies (includes conjoined twins, VATER)

Surgery for patent ductus arteriosus

## **eTable 2. Procedures Classified as Major or Minor<sup>a</sup>**

### **Major:**

Ventriculostomy  
Placement of ventricular reservoir  
Placement of ventricular shunt for hydrocephalus  
Removal of ventricular shunt  
Placement of a subgaleal shunt  
Partial resection of brain tumor  
Elevation and reconstruction of skull fracture  
Craniotomy for abscess drainage; and direct laryngoscopy and bronchoscopy  
Burr hole evacuation of subdural hematoma  
Resection of encephalocele and occipital scalp  
Eye exam under anesthesia  
Removal of dacryocystocele  
Cataract removal, vitrectomy, lensectomy  
Trabeculotomy of both eyes  
Eye surgery for cycloplegia-iridial adhesions  
Bilateral vitrectomy  
Surgery for detached retina  
Tracheostomy  
Subglottic granuloma reduction  
Anterior cricoid split  
Placement of nasal stints and drainage of elbow abscess  
Resection of cystic adenomatoid malformation  
Flexible laryngoscopy under general anesthesia  
Bronchoscopy  
Micro laryngoscopy and laryngotracheoplasty  
Correction of choanal atresia  
Repair of cleft lip  
Supraglottoplasty  
Removal of and replacement of chest tube under general anesthesia  
Thoracotomy  
Repair of thoracic duct for chylothorax  
Thoracic duct ligation and placement of Broviac catheters  
Pleurodesis for chylothorax  
Pulmonary lobectomy  
Resection of pneumatocele  
Tracheoesophageal fistula and esophageal atresia repair  
Aneurysm ligation  
Thoracotomy, exploratory laparotomy and ostomy takedown  
Ventricular epicardial pacemaker placement  
Surgical removal of retained central catheter from iliac vein to right atrium  
Silo placement  
Silo closure  
Laparotomy  
Laparotomy and extraction of meconium plug  
Pyloromyotomy  
Pyloroplasty  
Ileostomy  
Ileocectomy  
Ileostomy revision and takedown  
Jejunostomy  
Colostomy  
Laparoscopic cholecystotomy  
Bowel resection and end-to-end anastomosis  
Resection and ileostomy; resection and jejunostomy; placement of drain  
Resection of bowel stricture  
Resection and repair of bowel perforation

### **eTable 2. Procedures Classified as Major or Minor (continued)**

Ostomy takedown and reanastomosis  
 Excision of vitelline omphalomesenteric duct and necrotic bowel  
 Appendectomy  
 Repair of esophageal perforation  
 Repair of gastric perforation  
 Repair of colonic perforation  
 Diaphragmatic hernia repair  
 Hiatal hernia repair  
 Fundoplication  
 Diaphragmatic plication  
 Nissen plication of diaphragm and placement of gastrostomy tube  
 Abdominal mesh replacement  
 Abdominoplasty  
 Abdominal patch closure, abdominal wound debridement and skin closure  
 Hartman's pouch  
 Open liver biopsy  
 Removal of liver hematoma  
 Repair of rupture of dome of right lobe of liver  
 Drainage of liver abscess and rectal biopsy  
 Repair of malrotation  
 Reduction of volvulus  
 Ladd's procedure  
 Omentectomy  
 Hemicolectomy  
 Colectomy  
 Bowel evisceration and reanastomosis  
 Duodenal atresia repair with gastrostomy tube placement  
 Extensive lysis of adhesions  
 Lysis of adhesions and lavage of meconium  
 Adrenectomy  
 Resection of teratoma  
 Biopsy of large intestine  
 Rectal biopsy; and debridement of arm abscess  
 Rectal irrigation and contrast enema under general anesthesia  
 Repair of exstrophy of the bladder  
 Radical nephrectomy; and central line placement  
 Repair of bladder perforation and T-tube placement  
 Urinary diversion  
 Renal exploration  
 Double nephrostomy and catheter placement  
 Nephrostomy  
 Orchiopexy (with other procedures)  
 Resection of ovarian cyst  
 Oophorectomy, lysis of adhesions, aspiration of ovarian cyst  
 Nasolabial repair  
 Neck resection  
 Incision and drainage of neck abscess  
 Incision and drainage of axilla abscess with general anesthesia  
 Incision and debridement of shoulder mass  
 Repair of fascia with retention sutures  
 Amputation of forearm  
 Amputation below elbow  
 Amputation of hand  
 Amputation of 4 necrotic digits  
 Reattachment of finger tip  
 Hand skin graft  
 Bilateral lower extremity amputation

**eTable 2. Procedures Classified as Major or Minor (continued)**

Above knee amputation

Amputation of foot and ankle  
Arm surgery for osteomyelitis  
Debridement of hand wound  
Debridement and graft  
Irrigation and debridement of thigh with biopsy of the soft tissue  
Arthrotomy and aspiration arthrogram of multiple joints  
Wound dehiscence repair  
Release of congenital amniotic band

**Minor:**

Central venous line placement  
Venous access port  
Cutdown to remove peripherally inserted central catheter  
Surgical removal of peripherally inserted central catheter fragment  
Surgical removal of broken-off umbilical vein catheter; and tap pericardial effusion  
Removal of Broviac catheter  
Removal of infected line  
Excision of saphenous vein  
Extracorporeal membrane oxygenation cannulation  
Ventricular tap  
Needle aspiration of brain abscess  
Incision and drainage of axillary abscess  
Incision and drainage of glenohumeral joint abscess  
Incision and drainage of antecubital fossa abscess  
Incision and drainage of chest wall abscess  
Incision and drainage of scrotal abscess  
Incision and drainage of left hip  
Incision and drainage of thigh abscess  
Hip and femur aspiration  
Cyst excision  
Washout of wound  
Repair of ear laceration  
Repair of chest wall and back laceration  
Wound closure  
Laser treatment of granuloma  
Laser surgery for elbow hemangioma  
Cryotherapy  
Diagnostic laparoscopy  
Telescopic laryngoscopy  
Diagnostic thoracoscopy and tube placement  
Removal of laryngeal granulation tissue  
Supraglottoplasty (laser)  
Subglottic cyst removed  
Thoracentesis  
Chest tube placement  
Pericardial drain  
Pericardiocentesis  
Pacemaker insertion  
Liver biopsy  
Rectal biopsy  
Gastrostomy and feeding tube placement  
Peritoneal and abdominal drain  
Gastroschisis repair  
Omphalocele repair  
Incisional hernia repair  
Inguinal hernia repair

**eTable 2. Procedures Classified as Major or Minor (continued)**

Umbilical hernia repair  
Orchiopexy (only)

Hydrocele repair  
Testicular torsion repair  
Vesicostomy  
Nephrostomy tube placement  
Removal of bilateral supernumerary digits  
Repair of laceration to dorsal aspect wrist and hand  
Hip arthrotomy  
Hip drain and femoral bone aspiration and arthrotomy  
Revision right knee amputation  
Surgical debridement and drainage of septic knee  
Leg fasciotomy  
Amputation of toes  
Fascial closure

<sup>a</sup> Annotations also indicated when multiple procedures were performed under one episode of general anesthesia and included a procedure that usually is performed under non-general anesthesia. If an infant was exposed to both types of procedure on the same occasion, the infant was classified with the major surgery group. The classifications of selected procedures were changed for sensitivity analyses.



**eTable 3. Distribution of Surgical Procedures between Patient Subgroups**

| <b>Surgical Procedure Anatomical System or Number/Patient</b> | <b>Major Surgery<sup>a</sup></b> | <b>Minor Surgery</b> |
|---------------------------------------------------------------|----------------------------------|----------------------|
| Gastrointestinal, column No./row total (%)                    | 1962/2559 (77)                   | 597/2559 (23)        |
| Pulmonary, column No./row total (%)                           | 173/177 (98)                     | 4/177 (2)            |
| Genitourinary, column No./row total (%)                       | 8/14 (57)                        | 6/14 (43)            |
| Head and neck, column No./row total (%)                       | 5/5 (100)                        | 0/5 (0)              |
| Central nervous system, column No./row total (%)              | 170/172 (99)                     | 2/172 (1)            |
| Ophthalmologic, column No./row total (%)                      | 1021/1022 (100)                  | 1/1022 (0)           |
| Orthopedic, column No./row total (%)                          | 14/20 (70)                       | 6/20 (30)            |
| Other, column No./row total (%)                               | 672/680 (99)                     | 8/680 (1)            |
| Number of procedures/patient                                  |                                  |                      |
| 1, No.                                                        | 1128                             | 762                  |
| 2, No.                                                        | 516                              | 21                   |
| ≥3, No.                                                       | 542                              | 1                    |

<sup>a</sup>With or without additional minor surgical procedure

**eTable 4. Model 2: Multivariable Logistic Regression Analysis of the Secondary Outcome Neurodevelopmental Impairment among Survivors at 18-22 Months' Corrected Age with Two-Level Surgery Predictor Variable**

| Variable <sup>a</sup>                                                     | Adjusted Odds Ratio |        |      |
|---------------------------------------------------------------------------|---------------------|--------|------|
|                                                                           | Estimate            | 95% CI |      |
| Surgery vs no surgery                                                     | 1.31                | 1.09   | 1.59 |
| Number of surgeries (for each additional surgery)                         | 1.20                | 1.10   | 1.31 |
| Birth weight (for each 250 g increase in weight)                          | 0.68                | 0.58   | 0.80 |
| Small-for-gestational-age                                                 | 1.26                | 1.09   | 1.47 |
| Male                                                                      | 1.65                | 1.43   | 1.90 |
| Multiple birth cohort                                                     | 1.32                | 1.16   | 1.50 |
| Caucasian                                                                 | 0.79                | 0.70   | 0.88 |
| 5-min Apgar score ≤ 3                                                     | 1.27                | 1.04   | 1.56 |
| Antenatal corticosteroid exposure                                         | 0.82                | 0.70   | 0.97 |
| Postnatal corticosteroid exposure                                         | 1.43                | 1.21   | 1.70 |
| Seizures                                                                  | 2.71                | 2.12   | 3.47 |
| Severe intracranial hemorrhage and/or cystic periventricular leukomalacia | 2.15                | 1.80   | 2.58 |
| Bronchopulmonary dysplasia (supplemental O2 at 36 wk)                     | 1.35                | 1.15   | 1.60 |
| Sepsis and/or meningitis                                                  | 1.21                | 1.02   | 1.43 |
| Necrotizing enterocolitis (Bell stage ≥ IIA)                              | 1.11                | 0.72   | 1.71 |
| Patent ductus arteriosus, excluding surgically closed patients            | 1.07                | 0.95   | 1.21 |
| Caregiver highest educational level:                                      |                     |        |      |
| 10-12 y vs ≤9 y                                                           | 0.86                | 0.68   | 1.08 |
| >12 y vs ≤9 y                                                             | 0.64                | 0.52   | 0.78 |

**eTable 4. Model 2: Multivariable Logistic Regression Analysis of the Secondary Outcome Neurodevelopmental Impairment among Survivors at 18-22 Months' Corrected Age with Two-Level Surgery Predictor Variable (continued)**

| Variable <sup>a</sup>                                                                            | Adjusted Odds Ratio |        |      |
|--------------------------------------------------------------------------------------------------|---------------------|--------|------|
|                                                                                                  | Estimate            | 95% CI |      |
| Birth year: 2006-2009 vs. 1998-2002 <sup>b</sup>                                                 | 0.48                | 0.41   | 0.56 |
| Inborn                                                                                           | 0.76                | 0.61   | 0.94 |
| Propensity score- surgery <sup>c</sup> ,<br>AOR per 10% increase in the<br>predicted probability | 1.03                | 0.93   | 1.14 |

<sup>a</sup>Neonatal Research Network center

variable is also included in the model.

<sup>b</sup>Birth year variable parameters changed to obtain optimal estimate of confidence interval.

<sup>c</sup>Included in the PS model were BW, SGA, sex, race, 5-minute Apgar score, ICH, BPD, sepsis and/or meningitis, NEC, PDA, multiple birth cohort, ANS, PNS, highest level of education attained by primary caregiver, birth year, and center.

**eTable 5. Model 4: Multivariable Logistic Regression Analysis of the Secondary Outcome Neurodevelopmental Impairment among Survivors at 18-22 Months' Corrected Age with Three-Level Surgery Predictor Variable**

| Variable <sup>a</sup>                                                     | Adjusted Odds Ratio |        |      |
|---------------------------------------------------------------------------|---------------------|--------|------|
|                                                                           | Estimate            | 95% CI |      |
| Major surgery vs no surgery                                               | 1.56                | 1.26   | 1.93 |
| Major surgery vs minor surgery                                            | 1.47                | 1.14   | 1.89 |
| Minor surgery vs no surgery                                               | 1.06                | 0.84   | 1.35 |
| Number of surgeries (for each additional surgery)                         | 1.15                | 1.05   | 1.26 |
| Birth weight (for each 250 g increase in weight)                          | 0.70                | 0.60   | 0.81 |
| Small-for-gestational-age                                                 | 1.33                | 1.14   | 1.56 |
| Male                                                                      | 1.78                | 1.51   | 2.09 |
| Multiple birth cohort                                                     | 1.35                | 1.19   | 1.54 |
| Caucasian                                                                 | 0.76                | 0.68   | 0.86 |
| 5-min Apgar score ≤ 3                                                     | 1.24                | 1.01   | 1.51 |
| Antenatal corticosteroid exposure                                         | 0.82                | 0.70   | 0.96 |
| Postnatal corticosteroid exposure                                         | 1.47                | 1.24   | 1.75 |
| Seizures                                                                  | 2.66                | 2.07   | 3.40 |
| Severe intracranial hemorrhage and/or cystic periventricular leukomalacia | 2.07                | 1.74   | 2.47 |
| Bronchopulmonary dysplasia (supplemental O2 at 36 wk)                     | 1.32                | 1.13   | 1.55 |
| Sepsis and/or meningitis                                                  | 1.17                | 0.10   | 1.37 |
| Necrotizing enterocolitis (Bell stage ≥IIA)                               | 1.07                | 0.72   | 1.60 |
| Patent ductus arteriosus, excluding surgically closed patients            | 1.09                | 0.96   | 1.23 |
| Caregiver highest educational level:                                      |                     |        |      |
| 10-12 y vs ≤9 y                                                           | 0.86                | 0.68   | 1.08 |
| >12 y vs ≤9 y                                                             | 0.64                | 0.52   | 0.78 |

**eTable 5. Model 4: Multivariable Logistic Regression Analysis of the Secondary Outcome Neurodevelopmental Impairment among Survivors at 18-22 Months' Corrected Age with Three-Level Surgery Predictor Variable (continued)**

| Variable <sup>a</sup>                                                                           | Adjusted Odds Ratio |        |      |
|-------------------------------------------------------------------------------------------------|---------------------|--------|------|
|                                                                                                 | Estimate            | 95% CI |      |
| Birth year <sup>b</sup> : 2006-2009 vs 1998-2005                                                | 0.46                | 0.40   | 0.54 |
| Inborn                                                                                          | 0.76                | 0.62   | 0.95 |
| Propensity score <sup>c</sup> , minor surgery AOR per 10% increase in the predicted probability | 0.89                | 0.73   | 1.09 |
| Propensity score <sup>c</sup> , major surgery AOR per 10% increase in the predicted probability | 1.06                | 0.96   | 1.16 |

variable is also included in the model.  
to obtain optimal estimate of confidence interval.

<sup>a</sup>Neonatal Research Network center  
<sup>b</sup>Birth year variable parameters changed  
<sup>c</sup>Included in the PS model were BW, SGA, sex, race, 5-minute Apgar score, ICH, BPD, sepsis and/or meningitis, NEC, PDA, multiple birth cohort, ANS, PNS, highest level of education attained by primary caregiver, birth year, and center.

**eTable 6. Demonstration of Propensity Score Achievement of Balanced Distribution of Covariates.**

| Covariates in the Model           | Overall Effect of Surgery Unadjusted | Overall Effect of Surgery Adjusted for the Propensity Scores |
|-----------------------------------|--------------------------------------|--------------------------------------------------------------|
|                                   | P-Value                              | P-Value                                                      |
| Male                              | <.0001                               | 0.6374                                                       |
| Birth weight                      | <.0001                               | 0.5584                                                       |
| Small-for-gestational-age         | <.0001                               | 0.6494                                                       |
| Multiple birth cohort             | 0.0209                               | 0.9486                                                       |
| 5 minute Apgar $\leq$ 3           | 0.0099                               | 0.6588                                                       |
| Postnatal corticosteroid exposure | <.0001                               | 0.5088                                                       |
| Severe ICH                        | <.0001                               | 0.0100 <sup>a</sup> , 0.1054 <sup>b</sup>                    |
| Bronchopulmonary dysplasia        | <.0001                               | 0.8603                                                       |
| Sepsis and/or meningitis          | <.0001                               | 0.3517                                                       |
| Necrotizing enterocolitis         | <.0001                               | 0.3777 <sup>c</sup>                                          |
| Patent ductus arteriosus          | <.0001                               | 0.8939                                                       |
| Birth year                        | <.0001                               | 0.9104                                                       |
| Inborn                            | 0.0003                               | 0.1733                                                       |

To determine how successful the propensity score is in balancing the distribution of the covariates across the surgery groups, we chose key covariates that seem to have a significant association with surgery (major, minor, and no surgery). We regressed each of these covariates on the three-level surgery variable and the propensity score quintiles of major and minor surgery. If the overall surgery effect is not significant, this implies that the covariate is balanced across the three surgery groups. Taking quintiles of the two propensity scores amounts to dividing the entire cohort into 5X5= 25 groups with similar propensity scores of major and minor surgeries. To determine if we have achieved the balancing of covariates across the treatment groups, we compared the means and proportions across the treatment levels for these 25 groups, which we achieved by regressing the covariates on treatment and propensity score quintiles/ propensity scores.

<sup>a</sup>Adjusting for the propensity score quintiles shows the surgery effect to be still significant.

<sup>b</sup>However, adjusting for the propensity scores of major and minor surgery shows the surgery effect to be not significant, indicating that balance is achieved.

<sup>c</sup>The model for NEC did not converge with the propensity score quintiles, so the propensity scores of major and minor surgery were used.
